# Supplementary material
Source: MDPI journal article supplement (https://www.mdpi.com/2673-8430/4/2/7)
Supplement: s1 [file s1]

**Supplementary Table S1.** Clinical procedure for non-cued and cued sing leg heel raise tests.

| Procedure      | Non-cued                                                                                                                     | Cued                                                                                                                                                                                                                                                                                                                                                                                                                                                                                                                                                                                      |
|----------------|------------------------------------------------------------------------------------------------------------------------------|-------------------------------------------------------------------------------------------------------------------------------------------------------------------------------------------------------------------------------------------------------------------------------------------------------------------------------------------------------------------------------------------------------------------------------------------------------------------------------------------------------------------------------------------------------------------------------------------|
| Pre-test setup | <ul style="list-style-type: none"> <li>• Facing wall</li> <li>• Fingertips at shoulder height</li> <li>• Barefoot</li> </ul> | <ul style="list-style-type: none"> <li>• Facing wall</li> <li>• Fingertips at shoulder height</li> <li>• Barefoot</li> <li>• Metronome set: 60bpm</li> <li>• Maximum SLHR height observed</li> </ul>                                                                                                                                                                                                                                                                                                                                                                                      |
| Technique cues | <ul style="list-style-type: none"> <li>• None</li> </ul>                                                                     | <ul style="list-style-type: none"> <li>• Keep the knee straight</li> <li>• Align the middle of the ankle joint over the second toe</li> <li>• No rocking the body back and forth</li> <li>• Reach full height each repetition</li> </ul>                                                                                                                                                                                                                                                                                                                                                  |
| Test cessation | <ul style="list-style-type: none"> <li>• Volitional failure</li> </ul>                                                       | <ul style="list-style-type: none"> <li>• Volitional failure</li> <li>• Technique failure for two consecutive repetitions, with a warning provided:               <ol style="list-style-type: none"> <li>(1) Unable to maintain metronome pace (60bpm)</li> <li>(2) Unable to maintain technical cues, resulting in:                   <ul style="list-style-type: none"> <li>- Knee flexion</li> <li>- Forward trunk lean or ‘rocking’</li> <li>- Hip strategy</li> <li>- Reduced heel raise height</li> <li>- Foot and ankle alignment/position error</li> </ul> </li> </ol> </li> </ul> |
| Rate           | <ul style="list-style-type: none"> <li>• Self-selected</li> </ul>                                                            | <ul style="list-style-type: none"> <li>• 60bpm</li> </ul>                                                                                                                                                                                                                                                                                                                                                                                                                                                                                                                                 |

**Legend:** SLHR= single leg heel raise; bpm= beats per minute

**Supplementary Table S2.** Intrinsic player characteristics.

|       |          | Chronological age |     |       | Height (cm) |       |         | Weight (kg) |      |        | BMI       |      |           | Playing age (yrs) |     |      | Training age: Calf RT (yrs) |     |      |
|-------|----------|-------------------|-----|-------|-------------|-------|---------|-------------|------|--------|-----------|------|-----------|-------------------|-----|------|-----------------------------|-----|------|
|       | n(%)     | Mean(SD)          | Mdn | R     | Mean(SD)    | Mdn   | R       | Mean(SD)    | Mdn  | R      | Mean(SD)  | Mdn  | R         | Mean(SD)          | Mdn | R    | Mean(SD)                    | Mdn | R    |
| All   | 51       | 21.9(3.8)         | 21  | 17-33 | 178.8(12.1) | 178   | 156-205 | 76.5(12.7)  | 75   | 51-119 | 23.8(2.3) | 23.5 | 18.4-31.3 | 9.2(5.6)          | 10  | 1-20 | 4.2(2.9)                    | 4   | 1-15 |
| Women | 23(45.1) | 23.1(4.6)         | 21  | 17-33 | 168.2(6.5)  | 168   | 156-181 | 67.1(7.6)   | 66   | 51-80  | 23.7(2.9) | 23.3 | 18.4-31.3 | 4.3(2.4)          | 4   | 1-11 | 4.3(2.4)                    | 3.5 | 1-8  |
| Men   | 28(54.9) | 20.9(2.6)         | 21  | 17-27 | 187.6(7.9)  | 186.5 | 176-205 | 84.3(10.6)  | 81.5 | 68-119 | 23.9(1.7) | 23.7 | 21.2-28.3 | 13.3(3.9)         | 14  | 4-20 | 4.2(3.2)                    | 4   | 1-15 |

**Legend:** SD=standard deviation; R=range; cm= centimetres; kg= kilograms; BMI=body mass index; yrs= year

**Supplementary Table S3.** Player demographic information.

|                          |                                  | n(%)     |
|--------------------------|----------------------------------|----------|
| <b>All players</b>       |                                  | 51       |
| <b>Gender</b>            |                                  |          |
|                          | Women                            | 23(45.1) |
|                          | Men                              | 28(54.9) |
| <b>Ethnicity</b>         |                                  |          |
|                          | Indigenous                       | 3(5.9)   |
|                          | Non-Indigenous Australian        | 45(88.2) |
|                          | Other                            | 3(5.9)   |
| <b>Competition level</b> |                                  |          |
|                          | League                           | 33(64.7) |
|                          | Reserves                         | 18(35.3) |
| <b>Previous injury</b>   |                                  |          |
|                          | Any recent history               | 30(58.8) |
|                          | None                             | 21(41.2) |
|                          | Recent time loss injury          | 20(39.2) |
|                          | None                             | 31(60.8) |
|                          | Region: Lower limb (any)         | 23(45.1) |
|                          | Type: LL muscle-tendon           | 20(39.2) |
|                          | Location: Lower leg, ankle, foot | 13(25.4) |
